# Supplementary material for: Caspase-6 Knockout in the 5xFAD Model of Alzheimer’s Disease Reveals Favorable Outcome on Memory and Neurological Hallmarks
Source: MDPI journal article supplement (doi:10.3390/ijms21031144), 2020-02-09
Supplement: s1 [file s1]

Caspase-6 knockout in the 5xFAD model of Alzheimer's disease reveals favorable outcome on memory and neurological hallmarks

Ariel Angel<sup>1</sup>, Rotem Volkman<sup>1</sup>, Tabitha Grace Royal<sup>3</sup>, Daniel Offen<sup>1,2</sup>

**Supplementary material:**

**Supplementary Table S1 - Genotype summary and group stratification**

| Genotype                      | Description               | Abbreviation | Number of animals |      |
|-------------------------------|---------------------------|--------------|-------------------|------|
|                               |                           |              | Female            | Male |
| 5xFAD (-/-) x Caspase-6 (+/-) | Wild type x Heterozygote  | WT/C6-Het    | 11                | 9    |
| 5xFAD (-/-) x Caspase-6 (-/-) | Wild type x KO            | WT/C6-KO     | 13                | 12   |
| 5xFAD (+/-) x Caspase-6 (+/-) | Transgenic x Heterozygote | 5xFAD/C6-Het | 17                | 15   |
| 5xFAD (+/-) x Caspase-6 (-/-) | Transgenic x KO           | 5xFAD/C6-KO  | 18                | 12   |

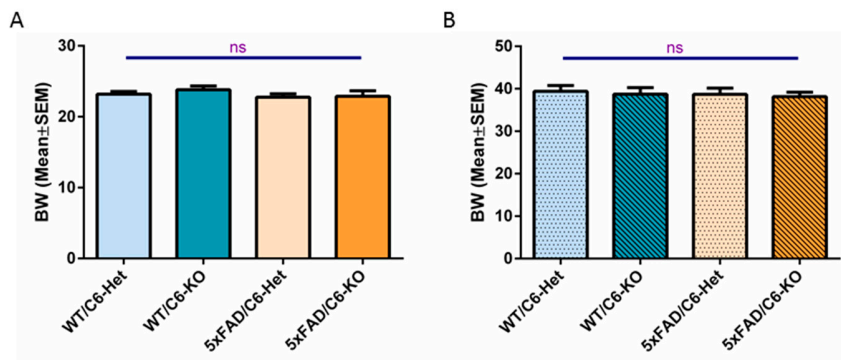

**Figure S1- Average body weight of animals was identical throughout each group in accordance with gender.**

Average body weight (BW) at 7 months for female (A) and male (B) mice

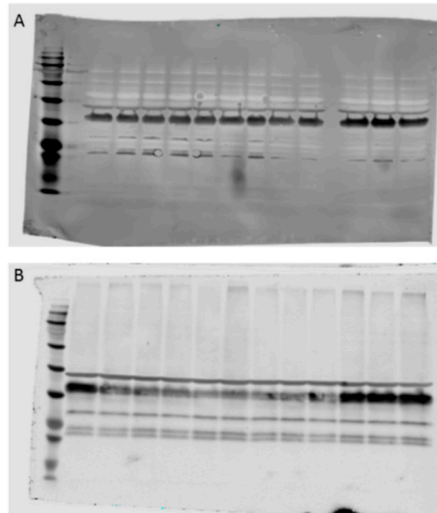

**Figure S2 – Uncropped western blots for synaptophysin**

Male (A) and female (B) immunoblots for synaptophysin and actin. Legends available on Figure 4.

Caspase-6 knockout in the 5xFAD model of Alzheimer's disease reveals favorable outcome on memory and neurological hallmarks

Ariel Angel<sup>1</sup>, Rotem Volkman<sup>1</sup>, Tabitha Grace Royal<sup>3</sup>, Daniel Offen<sup>1,2</sup>

Supplementary Table S2 – Gender differences in 5xFAD/C6-KO mice

| Parameter evaluated            | Result in females 5xFAD/C6-KO                                                | Result in males 5xFAD/C6-KO                                                    |
|--------------------------------|------------------------------------------------------------------------------|--------------------------------------------------------------------------------|
| Y-Maze                         | Significant increase in time spent in novel arm                              | No effect compared to 5xFAD/C6-Het                                             |
| Elevated plus maze             | Significant decrease in time spent in open arms                              | No model established                                                           |
| Morris water maze - Learning   | Faster learning on the second day. No further improvement in subsequent days | Faster learning from the second day. Significant improvement by the fourth day |
| Morris water maze – Probe test | Slight increase in time spent in quadrant                                    | Significant increase in time spent in quadrant                                 |
| Synaptophysin                  | Significant increase in protein expression in Hippocampus                    | Significant increase in protein expression in Hippocampus                      |
| TNF $\alpha$ mRNA              | No effect compared to 5xFAD/C6-Het                                           | Significant decrease compared to 5xFAD/C6-Het                                  |
| IL-10 mRNA                     | Significant increase compared to 5xFAD/C6-Het                                | Significant increase compared to 5xFAD/C6-Het                                  |
| Caspase-3 mRNA                 | No effect compared to 5xFAD/C6-Het                                           | Significant decrease compared to 5xFAD/C6-Het                                  |
| Amyloid plaque                 | Significant decrease in plaque formation in Hippocampus                      | Significant decrease in plaque formation in Hippocampus                        |
| GFAP                           | Significant decrease compared to 5xFAD/C6-Het                                | No effect compared to 5xFAD/C6-Het                                             |
| IBA1                           | Significant decrease compared to 5xFAD/C6-Het                                | Significant decrease compared to 5xFAD/C6-Het                                  |

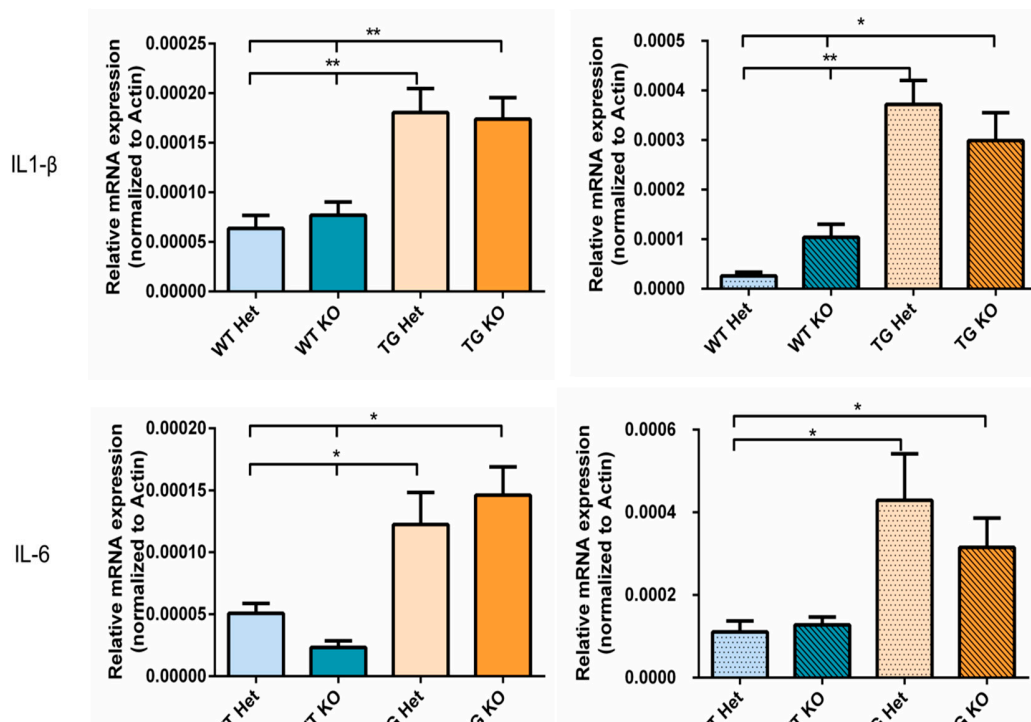

Supplement Figure S3 – Pro-inflammatory cytokines gene expression in mice hippocampi

mRNA quantification of pro-inflammatory cytokines IL1- $\beta$  and IL-6 from female and male mice hippocampi. No significant difference was found between the two AD groups. Data are mean  $\pm$  SEM. \*P < 0.05, \*\*P < 0.01. Two-tailed t-test between marked groups.
